# Supplementary material for: History of Polish Canidae (Carnivora, Mammalia) and Their Biochronological Implications on the Eurasian Background
Source: MDPI journal article supplement (doi:10.3390/genes14030539), 2023-02-21
Supplement: s1 [file s1]

## List of Polish sites with canid remains in chronological order

**1. Site:** Podlesice (4.9-4.2 myr).

**Canid species:** Canidae indet. (jackal size).

**Sources:** this paper.

**2. Site:** Mała Cave, layers 4-5 (4.9-4.2 myr).

**Canid species:** Canidae indet. (jackal size).

**Sources:** this paper.

**3. Site:** Węże 1 (3.8-3.4 myr).

**Canid species:** *Eucyon odessanus*, *Nyctereutes donnezani*.

**Sources:** [1–8]

**4. Site:** Ewy Cave (3.8-3.4 myr).

**Canid species:** Canidae indet (fox size).

**Sources:** this paper.

**5. Site:** Raciszyn 1 (3.8-3.4 myr).

**Canid species:** Canidae indet (fox size).

**Sources:** this paper.

**6. Site:** Mokra 1 (3.8-3.4 myr).

**Canid species:** Canidae indet (fox size).

**Sources:** this paper.

**7. Site:** Zalesiaki 1B (3.8-3.2 myr).

**Canid species:** Canidae indet (fox size).

**Sources:** this paper.

**8. Site:** Węże 2 (2.9-2.6 myr).

**Canid species:** *Canis* cf. *etruscus*, *Nyctereutes* sp.

**Sources:** this paper.

**9. Site:** Rębielice Królewskie 1A (2.4-2.2 myr).

**Canid species:** *Lycaon falconeri*, *Canis etruscus*.

**Sources:** this paper.

**10. Site:** Mokra 2 (2.6-2.2 myr).

**Canid species:** *Vulpes* sp.

**Sources:** this paper.

**11. Site:** Zamkowa Dolna Cave, fauna A (2.4-2.2 myr).

**Canid species:** *Lycaon falconeri*, *Canis etruscus*, *Vulpes* cf. *alopeoides*.

**Sources:** this paper.

**12. Site:** Kielniki 3B (2.2-1.8 myr).

**Canid species:** *Canis etruscus*, *Vulpes* cf. *alopeoides*.

**Sources:** this paper.

**13. Site:** Kadzielnia (2.2-1.8 myr).

**Canid species:** *Canis etruscus*, *Vulpes praeglacialis*.

**Sources:** this paper.

**14. Site:** Kamyk (1.9-1.8 myr).

**Canid species:** *Canis etruscus*, *Vulpes praeglacialis*.

**Sources:** [9–11].

**15. Site:** Żabia Cave (1.7-1.5 myr).

**Canid species:** *Lycaon lycaonoides*, *Canis mosbachensis*, *Vulpes praeglacialis*.

**Sources:** [12–13].

**12. Site:** Kielniki 3A (1.5-1.3 myr).

**Canid species:** *Canis mosbachensis*, *Vulpes praeglacialis*.

**Sources:** this paper.

**16. Site:** Zalesiaki 1A (1.1-0.9 myr).

**Canid species:** *Canis mosbachensis*, *Vulpes praeglacialis*.

**Sources:** [9–11].

**12. Site:** Kielniki 1 (1.1-0.8 myr).

**Canid species:** *Lycaon lycaonoides*, *Canis mosbachensis*, *Vulpes praeglacialis*.

**Sources:** [9-11].

**11. Site:** Zamkowa Dolna Cave, fauna C (1.0-0.8 myr).

**Canid species:** *Canis mosbachensis*, *Vulpes praeglacialis*.

**Sources:** this paper.

**17. Site:** Przymiłowice (MIS 22-17, 0.9-0.7 myr).

**Canid species:** *Canis mosbachensis*, *Vulpes praeglacialis*.

**Sources:** this paper.

**18. Site:** Kozi Grzbiet (MIS 19-17).

**Canid species:** *Lycaon lycaonoides*, *Canis mosbachensis*, *Vulpes praeglacialis*.

**Sources:** [9–11,14].

**19. Site:** Sitkówka (MIS 19-17).

**Canid species:** *Canis mosbachensis*.

**Sources:** this paper.

**20. Site:** Południowa Cave (MIS 17-15).

**Canid species:** *Lycaon lycaonoides*, *Canis mosbachensis*, *Vulpes vulpes angustidens*, *Vulpes praeglacialis*.

**Sources:** [15–21].

**9. Site:** Rębielice Królewskie 2 (MIS 15-13).

**Canid species:** *Canis mosbachensis*, *Vulpes vulpes angustidens*, *Vulpes praeglacialis*.

**Sources:** this paper.

**21. Site:** Tunel Wielki Cave (MIS 14-12).

**Canid species:** *Lycaon lycaonoides*, *Canis mosbachensis*, *Cuon alpinus priscus*, *Vulpes vulpes* ssp.

**Sources:** [22].

**22. Site:** Draby 3 (MIS 11).

**Canid species:** *Lycaon lycaonoides*, *Canis mosbachensis*, *Vulpes vulpes*.

**Sources:** [23].

**23. Site:** Biśnik Cave, layers 19ad-19 (MIS 9).

**Canid species:** *Canis lupus lunellensis*, *Cuon alpinus priscus*, *Vulpes vulpes*, *Vulpes lagopus*.

**Sources:** [23–24].

**24. Site:** Deszczowa Cave, fauna 1 (MIS 9-8?).

**Canid species:** *Canis lupus lunellensis*, *Cuon alpinus fossilis*, *Vulpes vulpes*, *Vulpes* cf. *praeglacialis*.

**Sources:** [23,25–27]

**25. Site:** Wschodnia Cave (MIS 8-7).

**Canid species:** *Canis lupus* ssp., *Cuon alpinus fossilis*, *Vulpes vulpes*, *Vulpes lagopus*.

**Sources:** [23].

**26. Site:** Naciekowa Cave (MIS 8).

**Canid species:** *Canis lupus* ssp., *Vulpes vulpes*.

**Sources:** [28].

**23. Site:** Biśnik Cave, layers 18-14 (MIS 7-6).

**Canid species:** *Canis lupus* ssp., *Cuon alpinus fossilis*, *Vulpes vulpes*, *Vulpes lagopus*.

**Sources:** [23,28].

**27. Site:** Wierzchowska Górna Cave (MIS 7-1).

**Canid species:** *Canis lupus* ssp., *Vulpes vulpes*, *Vulpes lagopus*.

**Sources:** [2,29–34].

**28. Site:** Nietoperzowa Cave (MIS 6-1).

**Canid species:** *Canis lupus spelaeus*, *Canis lupus lupus*, *Vulpes vulpes*, *Vulpes lagopus*.

**Sources:** [9,11,26,34–37].

**29. Site:** Komarowa Cave (MIS 6-1).

**Canid species:** *Canis lupus spelaeus*, *Canis lupus lupus*, *Vulpes vulpes*, *Vulpes lagopus*.

**Sources:** [26–27].

**30. Site:** Dziadowa Skała Cave (MIS 5e-1).

**Canid species:** *Canis lupus lupus*, *Vulpes vulpes*, *Vulpes lagopus*.

**Sources:** [46].

**31. Site:** Niedźwiedzia Cave (MIS 5-1).

**Canid species:** *Canis lupus spelaeus*, *Canis lupus lupus*, *Vulpes vulpes*, *Vulpes lagopus*.

**Sources:** [38–45].

**32. Site:** Mamutowa Cave (MIS 5-2).

**Canid species:** *Canis lupus spelaeus*, *Canis lupus lupus*, *Vulpes vulpes*, *Vulpes lagopus*.

**Sources:** [9,11,26,33,47–50].

**33. Site:** Koziarnia Cave (MIS 3).

**Canid species:** *Canis lupus spelaeus*, *Canis lupus lupus*, *Vulpes vulpes*, *Vulpes lagopus*.

**Sources:** [9,11,34–35,37,51].

**34. Site:** Stajnia Cave (MIS 6-1).

**Canid species:** *Canis lupus spelaeus*, *Canis lupus lupus*, *Cuon alpinus europaeus*, *Vulpes vulpes*, *Vulpes lagopus*.

**Sources:** [23,52].

**35. Site:** Raj Cave (MIS 5-2).

**Canid species:** *Canis lupus lupus*, *Vulpes vulpes*, *Vulpes lagopus*.

**Sources:** [9,53].

**36. Site:** Łokietka Cave (MIS 5-2).

**Canid species:** *Canis lupus lupus*, *Vulpes vulpes*, *Vulpes lagopus*.

**Sources:** [26].

**37. Site:** Towarna Cave (MIS 5-1).

**Canid species:** *Canis lupus lupus*, *Vulpes vulpes*, *Vulpes lagopus*.

**Sources:** [54].

**38. Site:** Ciemna Cave (MIS 5-1).

**Canid species:** *Canis lupus lupus*, *Vulpes vulpes*, *Vulpes lagopus*.

**Sources:** [26,34,55–56].

**23. Site:** Biśnik Cave, layers 12-1 (MIS 5-1).

**Canid species:** *Canis lupus spelaeus*, *Canis lupus lupus*, *Cuon alpinus europaeus*, *Vulpes vulpes*, *Vulpes lagopus*, *Vulpes corsac*.

**Sources:** [23].

**26. Site:** Naciekowa Cave (MIS 5-3).

**Canid species:** *Canis lupus spelaeus*, *Vulpes vulpes*, *Vulpes lagopus*.

**Sources:** [23,44–45].

**39. Site:** Obok Wschodniej Cave (MIS 4-3).

**Canid species:** *Canis lupus spelaeus*, *Vulpes vulpes*, *Vulpes lagopus*, *Vulpes corsac*.

**Sources:** [44–45].

**40. Site:** Północna Duża Cave (MIS 4-2).

**Canid species:** *Canis lupus spelaeus*, *Vulpes lagopus*.

**Sources:** [44–45].

**41. Site:** Wschodnia Cave (MIS 4-2).

**Canid species:** *Canis lupus spelaeus*, *Vulpes vulpes*, *Vulpes lagopus*.

**Sources:** [23,44–45].

**42. Site:** Radochowska Cave (MIS 5-1).

**Canid species:** *Canis lupus spelaeus*, *Canis lupus lupus*, *Cuon alpinus europaeus*, *Vulpes vulpes*, *Vulpes lagopus*.

**Sources:** [20,44–45,58–62].

**43. Site:** Obłazowa 1 Cave (MIS 3-1).

**Canid species:** *Canis lupus lupus*, *Vulpes vulpes*, *Vulpes lagopus*.

**Sources:** [63–64].

**44. Site:** Skarszyn (MIS 3, 45-35 kyr)

**Canid species:** *Canis lupus spelaeus*.

**Sources:** [65].

**45. Site:** Wrocław-Hallera (MIS 3, 45-35 kyr).

**Canid species:** *Canis lupus spelaeus*.

**Sources:** [66–67].

**46. Site:** Kraków-Spadzista (MIS 3, 33-29 kyr).

**Canid species:** *Canis lupus lupus*, *Vulpes lagopus*.

**Sources:** [26,68–70].

**47. Site:** Malschwitz (MIS 3?).

**Canid species:** *Canis lupus spelaeus*.

**Sources:** [67,71].

**48. Site:** Cave no 4 on Mount Birów (MIS 3-1).

**Canid species:** *Canis lupus spelaeus*, *Vulpes lagopus*.

**Sources:** [72].

**49. Site:** Borsucza Cave (MIS 3-1).

**Canid species:** *Vulpes vulpes*, *Vulpes lagopus*.

**Sources:** this paper.

**50. Site:** Jaksice 2 (MIS 2, 29-25 kyr).

**Canid species:** *Vulpes vulpes*, *Vulpes lagopus*.

**Sources:** [73].

**51. Site:** Borsuka Cave (MIS 3-1, 30-6 kyr).

**Canid species:** *Canis lupus lupus*, *Vulpes vulpes*, *Vulpes lagopus*.

**Sources:** [74].

**52. Site:** Pietraszyn (MIS 3).

**Canid species:** *Canis lupus spelaeus*, *Vulpes lagopus*.

**Sources:** this paper.

**53. Site:** Pyskowice (MIS 3).

**Canid species:** *Canis lupus spelaeus*, *Vulpes lagopus*.

**Sources:** this paper.

**54. Site:** Obłazowa 2 (MIS 3, 35-30 kyr).

**Canid species:** *Vulpes vulpes*.

**Sources:** [75].

**55. Site:** Biały Kamień Cave (MIS 3-1).

**Canid species:** *Canis lupus lupus*.

**Sources:** [44–45].

**56. Site:** Niedźwiedzia Górna Cave (MIS 3-1).

**Canid species:** *Canis lupus lupus*, *Vulpes vulpes*, *Vulpes lagopus*.

**Sources:** this paper.

**57. Site:** Zegar Cave (MIS 3-1).

**Canid species:** *Canis lupus lupus*, *Vulpes vulpes*, *Vulpes lagopus*.

**Sources:** [76].

**58. Site:** Miniaturka Cave (MIS 3-1).

**Canid species:** *Vulpes vulpes*, *Vulpes lagopus*.

**Sources:** [44–45].

**59. Site:** Rogóżka Cave (MIS 3-1).

**Canid species:** *Canis lupus lupus*, *Cuon alpinus europaeus*, *Vulpes vulpes*, *Vulpes lagopus*, *Vulpes corsac*.

**Sources:** [23,44–45,77–78].

**60. Site:** Zbójecka Cave (MIS 3-1).

**Canid species:** *Canis lupus lupus*, *Vulpes vulpes*, *Vulpes lagopus*.

**Sources:** [2,34–35].

**61. Site:** Solna Jama Cave (MIS 3-1).

**Canid species:** *Canis lupus lupus*, *Vulpes vulpes*, *Vulpes lagopus*.

**Sources:** [23,44–45,79].

**62. Site:** Magurska Cave (MIS 3-1).

**Canid species:** *Canis lupus lupus*.

**Sources:** [32–33,80–81].

**63. Site:** Gorenicka Cave (MIS 3-1).

**Canid species:** *Canis lupus lupus*, *Vulpes vulpes*.

**Sources:** [35].

**64. Site:** Deszczowa Cave, fauna 2 (MIS 3-1).

**Canid species:** *Canis lupus lupus*, *Vulpes vulpes*, *Vulpes lagopus*.

**Sources:** [25–27].

**65. Site:** Wilczyce (MIS 2, 16.1–15.5 kyr).

**Canid species:** *Vulpes vulpes*, *Vulpes lagopus*.

**Sources:** [82–86].

**66. Site:** Żytnia Skała Shelter (MIS 2-1).

**Canid species:** *Canis lupus lupus*, *Vulpes vulpes*, *Vulpes lagopus*.

**Sources:** [9,87].

**67. Site:** Murek Cave (MIS 2-1).

**Canid species:** *Vulpes lagopus*.

**Sources:** this paper.

**68. Site:** Nad Potoczkiem Cave (MIS 2-1).

**Canid species:** *Vulpes lagopus*.

**Sources:** this paper.

**69. Site:** Jasna Strzegowska Cave (MIS 2-1).

**Canid species:** *Vulpes lagopus*.

**Sources:** this paper.

**70. Site:** Zygmuntówka Quarry (MIS 2).

**Canid species:** *Canis lupus*, *Vulpes lagopus*.

**Sources:** this paper.

**71. Site:** Ruska Skała Shelter (MIS 2-1).

**Canid species:** *Vulpes lagopus*.

**Sources:** [88].

**72. Site:** Cisowe 1 Shelter (MIS 2-1).

**Canid species:** *Canis lupus lupus*, *Vulpes vulpes*, *Vulpes lagopus*.

**Sources:** [44–45].

**73. Site:** Na Ścianie Cave (MIS 2-1).

**Canid species:** *Canis lupus lupus*, *Vulpes vulpes*.

**Sources:** [44–45].

**74. Site:** Aven w Połomie Cave (MIS 2-1).

**Canid species:** *Canis lupus lupus*, *Vulpes vulpes*.

**Sources:** [44–45].

**75. Site:** Podlesice Shelter (MIS 2-1, 16.5–10.5 kyr).

**Canid species:** *Vulpes lagopus*.

**Sources:** [11,88–89].

**76. Site:** Okiennik Cave (MIS 2-1).

**Canid species:** *Canis lupus lupus*, *Vulpes vulpes*, *Vulpes lagopus*.

**Sources:** [2,34,55,90].

**77. Site:** na Miłaszówce Cave (MIS 2-1).

**Canid species:** *Canis lupus lupus*.

**Sources:** [31,91].

**78. Site:** na Gołabcu Cave (MIS 2-1).

**Canid species:** *Canis lupus lupus*, *Vulpes lagopus*.

**Sources:** [92–93].

**79. Site:** Krucza Skała Shelter (MIS 2-1, 16.5-13 kyr).

**Canid species:** *Vulpes* sp., *Vulpes lagopus*.

**Sources:** [94].

**80. Site:** Maszycka Cave (MIS 2-1).

**Canid species:** *Vulpes vulpes*.

**Sources:** [34,95].

**81. Site:** Sąspowska Zachodnia Cave (MIS 1).

**Canid species:** *Canis lupus lupus*, *Vulpes vulpes*.

**Sources:** [96].

**82. Site:** in Sobczański Wąwóz Cave (MIS 1).

**Canid species:** *Vulpes vulpes*.

**Sources:** [97].

**83. Site:** Puchacza Skała Shelter (MIS 1).

**Canid species:** *Canis lupus lupus*, *Vulpes vulpes*, *Vulpes lagopus*.

**Sources:** [9,98].

**84. Site:** Mroczna w Pośrednicy Cave (MIS 1).

**Canid species:** *Canis lupus lupus*, *Vulpes vulpes*.

**Sources:** [99].

**85. Site:** Shelter in Pośrednica 2 (MIS 1).

**Canid species:** *Vulpes vulpes*.

**Sources:** [100].

**86. Site:** Bramka Shelter (MIS 1).

**Canid species:** *Canis lupus lupus*, *Vulpes vulpes*, *Vulpes lagopus*.

**Sources:** [101–102].

**87. Site:** nad Galoską Cave (MIS 1).

**Canid species:** *Canis lupus lupus*, *Vulpes vulpes*.

**Sources:** [34,103].

**88. Site:** na Gaiku 2 Shelter (MIS 1).

**Canid species:** *Vulpes vulpes*.

**Sources:** [34,104].

**89. Site:** Przegińska Cave (MIS 1).

**Canid species:** *Vulpes vulpes*.

**Sources:** [34,103–104].

**90. Site:** Poszukiwaczy Skarbów Cave (MIS 1).

**Canid species:** *Canis lupus lupus*.

**Sources:** [93,105].

**91. Site:** Duża Cave at Mączna Skała (MIS 1).

**Canid species:** *Vulpes vulpes*.

**Sources:** this paper.

**92. Site:** Zalas Shelter (MIS 1).

**Canid species:** *Canis lupus lupus*, *Vulpes vulpes*.

**Sources:** [106].

**93. Site:** Cisowe 2 Shelter (MIS 1).

**Canid species:** *Vulpes vulpes*, *Vulpes lagopus*.

**Sources:** [44–45].

**94. Site:** Małgorzaty Shelter (MIS 1).

**Canid species:** *Canis lupus lupus*, *Vulpes vulpes*.

**Sources:** [44–45].

**95. Site:** Kuny Shelter (MIS 1).

**Canid species:** *Canis lupus lupus*, *Vulpes vulpes*.

**Sources:** [45].

**96. Site:** Wilcze Shelter (MIS 1).

**Canid species:** *Canis lupus lupus*, *Vulpes vulpes*.

**Sources:** this paper.

**97. Site:** Górne Shelter above Stajnia Cave (MIS 1).

**Canid species:** *Canis lupus lupus*, *Vulpes vulpes*.

**Sources:** this paper.

**98. Site:** Babie Nogi Shelter (MIS 1).

**Canid species:** *Canis lupus lupus*, *Vulpes vulpes*.

**Sources:** this paper.

**99. Site:** Panna Shelter (MIS 1).

**Canid species:** *Vulpes vulpes*.

**Sources:** [44–45].

**100. Site:** Trwoga Paleontologa Shelter (MIS 1).

**Canid species:** *Canis lupus lupus*, *Vulpes vulpes*.

**Sources:** [44–45].

**101. Site:** Pośrednie Shelter (MIS 1).

**Canid species:** *Vulpes vulpes*.

**Sources:** [100].

**102. Site:** Wilcze 1 Shelter (MIS 1).

**Canid species:** *Vulpes vulpes*.

**Sources:** [99].

**103. Site:** Shelter above Niedostępna Cave (MIS 1).

**Canid species:** *Vulpes vulpes*.

**Sources:** [96].

**104. Site:** Ciasna Cave (MIS 1).

**Canid species:** *Vulpes vulpes*.

**Sources:** this paper.

**105. Site:** nad Mosurem Starym Duża Cave (MIS 1, 3.5–1.5 kyr).

**Canid species:** *Vulpes vulpes*.

**Sources:** [11].



**106. Site:** Kontaktowa Cave (MIS 1).

**Canid species:** *Vulpes vulpes*.

**Sources:** [44–45].

**107. Site:** Jasna Smoleńska Cave (MIS 1).

**Canid species:** *Vulpes vulpes*.

**Sources:** [96].

**108. Site:** Olsztyńska i Wszystkich Świętych Cave (MIS 1).

**Canid species:** *Vulpes vulpes*.

**Sources:** [97].

**109. Site:** Ostrężnicka Cave (MIS 1).

**Canid species:** *Vulpes vulpes*.

**Sources:** [96].

**110. Site:** Kryształowa Cave (MIS 1).

**Canid species:** *Vulpes vulpes*.

**Sources:** this paper.

**111. Site:** Small Przy Torach Cave (MIS 1).

**Canid species:** *Vulpes vulpes*.

**Sources:** [44–45].

**112. Site:** Tczew (?).

**Canid species:** *Canis lupus* ssp.

**Sources:** [2,107].

**113. Site:** Elbląg (?).

**Canid species:** *Canis lupus* ssp.

**Sources:** [2,108–111].

**114. Site:** Trzebowisko (?).

**Canid species:** *Vulpes vulpes*.

**Sources:** [112].

**115. Site:** Rzeszów, Wisłoka river (?).

**Canid species:** *Canis lupus lupus*.

**Sources:** [33,112].

**116. Site:** Wielopolka (?).

**Canid species:** *Canis lupus* ssp.

**Sources:** [112].

## References

1. Stach, J. *Nyctereutes* (Canidae) w pliocenie Polski. *Acta Geol. Pol.* **1954**, 4(2), 191–206.
2. Kowalski, K. *Katalog ssaków plejstocenu Polski*. PWN, Warszawa, 1959; pp 227.
3. Kowalski, K. Les mammifères fossiles des remplissages karstiques de Pologne - problèmes paleobiologiques et stratigraphiques. In *Livre du centenaire Emile G. Racovitza, 1868-1968*; Orghidan, T.; Racovitza, G., Ed.; Académie de la république socialiste de Roumanie, Bucarest, **1970**, pp 491–498.
4. Kowalski, K. Historia i ewolucja lądowej fauny Polski (red.). *Fol. Quat.* **1989a**, 59-60, 1–276.
5. Kowalski, K. Stratigraphy of Neogene mammals of Poland. In *European Neogene mammal chronology*. Lindsay, E.H.; Fahlbusch, V.; Mein P., Eds.; Plenum Press, New York, **1990**, pp 193–209.
6. Czyżewska, T. *Nyctereutes sinensis* Schlosser (Canidae, Mammalia) from the Pliocene Breccia in Węże (Poland). *Acta Zool. Crac.* **1969**, 14(17), 441–450.
7. Czyżewska, T. Natural endocranial casts of the Canidae from Węże I near Działoszyn (Poland). *Acta Zool. Crac.* **1981**, 25(9), 251–260.
8. Ivanoff, D.V.; Wolsan, M.; Marciszak, A. 2014. Brainy stuff of long-gone dogs: a reappraisal of the supposed *Canis* endocranial cast from the Pliocene of Poland. *Sci. Nat.* **2014**, 101(8), 645-651. [<https://doi.org/10.1007/s00114-014-1200-4>]
9. Wolsan, M. Drapieżne - Carnivora. *Fol. Quat.* **1989**, 59-60, 177–197.
10. Wolsan, M. Lower Pleistocene carnivores of Poland. *Quarternärpaläontologie* **1990**, 8, 277–280.
11. Wolsan, M. Evolution des carnivores quaternaires en Europe centrale dans leur contexte stratigraphique et paleoclimatique. *L'Anthropologie* **1993**, 97, 203–222.
12. Bosák, P.; Głazek, J.; Horáček, I.; Szyrkiewicz, A. New locality of Early Pleistocene vertebrates - Żabia Cave at Podlesice, Central Poland. *Acta Geol. Pol.* **1982**, 32(3-4), 217–226.
13. Nadachowski, A.; Stefaniak, K.; Szyrkiewicz, A.; Marciszak, A.; Socha, P.; Schick, P.; August, C. Biostratigraphic importance of the Early Pleistocene fauna from Żabia Cave (Poland) in Central Europe. *Quat. Int.* **2011**, 243(1), 204–218. [<https://doi.org/10.1016/j.quaint.2011.04.037>]
14. Wiszniowska, T. Middle Pleistocene Carnivora (Mammalia) from Kozi Grzbiet in the Świętokrzyskie Mts., Poland. *Acta Zool. Crac.* **1989a**, 32, 589–630.
15. Langenhan, A. Ueber fossile Funde am Kitzelberg. *Z. Dtsch. Geol. Ges.* **1904a**, 56, 5–7.
16. Langenhan, A. Schädel eines Höhlenwolfs im Kitzelberg bei Kauffung im Katzbachtal. *Monatssch. Min., Gest.- und Petrefakt* **1904b**, 2, 24–25.
17. Langenhan, A. Funde fossiler Tierreste am Kitzelberg bei Kauffung im Katzbachtal. *Monatssch. Min., Gest.- und Petrefakt* **1904c**, 2, 26–28.
18. Langenhan, A. Über neue Funde fossiler Tierarten am Kitzelberg bei Kauffung. *Wanderer im Riesengebirge* **1904d**, 24(4/258), 56–58.
19. Wenke, R. Die diluvialen Säugetierreste vom Kitzelberge bei Kauffung. *Wanderer in Riesengebirge*, **1933**, 53 (9), 146–147.
20. Zötz, L.F. Die Altsteinzeit in Niederschlesien. Kabitsch Verlag, Leipzig, **1939a**, pp 144.
21. Zötz, L.F. Zur Altsteinzeit in Niederschlesien. *Altsch. Bl.* **1939b**, 14 (3), 94–98.

22. Kot, M.; Berto, C.; Krajcarz, M.T.; Moskal-del Hoyo, M.; Gryczewska, N.; Szymanek, M.; Marciszak, A.; Stefaniak, K.; Zarzecka-Szubińska, K.; Lipecki, G.; Wertz, K.; Madeyska, T. Frontiers of the Lower Palaeolithic expansion in Europe: Tunel Wielki Cave (Poland). *Sci. Rep.* **2022**, *12*, 16355. [<https://doi.org/10.1038/s41598-022-20582-0>]
23. Marciszak, A.; Kropczyk, A.; Lipecki, G. The first record of *Cuon alpinus* (Pallas, 1811) from Poland and the possible impact of other large canids on the evolution of the species. *J. Quat. Sci.* **2021**, *36*(6), 1101–1121. [<https://doi.org/10.1002/jqs.3340>]
24. Marciszak, A.; Socha, P.; Nadachowski, A.; Stefaniak, K. Carnivores from Biśnik Cave. *Quat. Hors-serie* **2011**, *4*, 101–106.
25. Cyrek, K.; Nadachowski, A.; Madeyska, T.; Bocheński, Z.; Tomek, T.; Wojtal, P.; Miękinia, B.; Lipecki, G.; Garapich, A.; Rzebiak-Kowalska, B.; Stworzewicz, E.; Wolsan, M.; Godawa, J.; Kościów, R.; Fostowicz-Frelik, Ł.; Szyndlar, Z. Excavation in the Deszczowa Cave (Kroczyckie Rocks, Częstochowa Upland, Central Poland). *Folia Quat.* **2000**, *71*, 5–84.
26. Wojtal, P. Zooarchaeological studies of the Late Pleistocene sites in Poland. ISEA PAS, Cracow, 2007, pp 189.
27. Nadachowski, A.; Źarski, M.; Urbanowski, M.; Wojtal, P.; Miękina, B.; Lipecki, G.; Ochman, K.; Krawczyk, M.; Jakubowski, G.; Tomek, T. Late Pleistocene environment of the Częstochowa Upland (Poland) reconstructed on the basis of faunistic evidence from archaeological cave sites. *ISEA PAS*, Kraków, 2009, pp 112.
28. Made v. d. J.; Stefaniak, K.; Marciszak, A. The Polish fossil record of the wolf *Canis* and the deer *Alces*, *Capreolus*, *Megaloceros*, *Dama* and *Cervus* in an evolutionary perspective. *Quat. Int.* **2014**, *326*–*327*, 406–430. [<https://doi.org/10.1016/j.quaint.2013.11.015>]
29. Ossowski, G. Sprawozdanie z badań paleo-etnologicznych w jaskiniach okolic Ojcowa w r. 1886. *Zbiór Wiad. Antrop. Kraj.* **1887a**, *11*, 12–32.
30. Ossowski, G. Fouillos de la Caverne de Wierzchowska-Gorna en Pologne. *Antiqua* **1887b**, *2*(2-5), 37–47.
31. Woldřich, J. N. Diluviale europäisch-nordasiatische Säugethierfauna und ihre Beziehungen zum Menschen. *Mém. Acad. imp. sci. St.-Petersbg. hist. Acad.* **1887**, *35*(10), 1–162
32. Kiernik, E. Materiały do paleozoologii dyluwialnych ssaków ziem polskich. Cz. 5. Szczątki wilka z dyluwium warstw ziem polskich. *Roz. Wydz. Mat.-Przyrod. PAU III* **1913a**, *13*, 491–541.
33. Kiernik, E. Materiały do paleozoologii dyluwialnych ssaków ziem polskich. Cz. 5. Familia: Canidae; Sectio: Lupinae. *Spraw. czynn. pos. PAU Kraków* **1913b**, *18*(7), 15.
34. Kowalski, K. *Jaskinie Polski, tom I*. Państwowe Muzeum Archeologiczne, Warszawa, **1951**; p 466.
35. Römer, F. Die Knochenhöhlen von Ojców in Polen. *Palaeontographica* **1883**, *29*, 1–41.
36. Kowalski, K. *Jaskinie Polski*. Wiedza Powszechna, seria: Przyroda Polska. Warszawa, **1965**; p 144.
37. Bigaj, J. Szczątki Canidae z plejstocenu Polski. *Folia Quat.* **1963**, *13*, 1–18.
38. Wiszniowska, T. Nowe znalezisko paleontologiczne w Sudetach. *Przeg. Zool.* **1967**, *11*, 430–433.
39. Wiszniowska, T. Wstępne wyniki badań fauny kopalnej w Jaskini Niedźwiedziej. *Acta Univ. Wratislav.* **1970**, *127*, 45–70.
40. Wiszniowska, T. Szczątki fauny w namuliskach jaskiń na Śląsku. *Prace Kom. Arch. PAN* **1986**, *3*, 9–19.

41. Wiszniowska, T. Kopalne szczątki zwierzęce. In *Jaskinia Niedźwiedzia w Kletnie. Badania i udostępniani*; Jahn, A.; Kozłowski, S.; Wiszniowska, T., Eds.; Zakład Narodowy imienia Ossolińskich, Wrocław-Warszawa, 1989b, pp 255–279.
42. Stefaniak, K.; Bieroński, J. Caves and rock shelters of the Eastern Sudetes - catalogue of important speleological features. *Stud. Fac. Earth Scien. Univ. Silesia* **2009**, *56*, 515–534.
43. Bieroński, J.; Stefaniak, K.; Hercman, H.; Socha, P.; Nadachowski, A. Palaeogeographical and palaeoecological studies of sediments of the Niedźwiedzia (Bear) Cave in Kletno. *Stud. Fac. Earth Scien. Univ. Silesia* **2009c**, *56*, 401–422.
44. Marciszak, A.; Stefaniak, K.; Gornig, W. Fossil theriofauna from the Sudety Mts (SW Poland). *The state of research. Cranium* **2016**, *33(1)*, 31–41.
45. Marciszak, A.; Sobczyk, A.; Kasprzak, M.; Gornig, W.; Ratajczak, U.; Wiśniewski, A.; Stefaniak, K. Taphonomic and paleoecological aspects of large mammals from Sudety Mts (Silesia, SW Poland), with particular interest to the carnivores. *Quat. Int.* **2020**, *546*, 42–63. [<https://doi.org/10.1016/j.quaint.2019.11.009>]
46. Chmielewski, W. Stanowisko paleolityczne w Dziadowej Skale koło Skarżyc w pow. zawierciańskim. *Prace Mat. Muzeum Archeol. Etnogr. Łódź Ser. Archeologiczna* **1958**, *3*, 5–48.
47. Zawisza, J. Jaskinia Mamuta w Dolinie Wierchowskiej. *Wiad. Archeol.* **1874**, *2*, 5–23.
48. Zawisza J. Dalsze poszukiwania w Jaskini Mamuta w czerwcu 1874 oraz Jaskinia Okopy odkryta w 1874. *Wiad. Archeol.* **1876**, *3*, 125–139.
49. Zawisza J. La caverne de Mammouth en Pologne. *Mém. Soc. géol. Fr.* **1878**, *1(2)*, 439–447.
50. Lubicz-Niezabitowski, E. Pardwy *Lagopus lagopus* L. i *Lagopus mutus* Montin oraz towarzysząca im fauna w czwartorzędzie Polski. *Rocz. Pol. Tow. Geol.* **1932**, *7(2)*, 179–192.
51. Chmielewski, W.; Kowalski, K.; Madeyska-Niklewska, T.; Sych, L. Wyniki badań osadów jaskini Koziarni w Sąpsowie, pow. Olkusz. *Folia Quat.* **1967**, *26*, 1–69
52. Żarski, M.; Winter, H.; Nadachowski, A.; Urbanowski, M.; Socha, P.; Kenig, K.; Marcinkowski, B.; Krzemińska, E.; Stefaniak, K.; Nowaczewska, W.; Marciszak, A. Stratigraphy and palaeoenvironment of Stajnia Cave (southern Poland) with regard to habitation of the site by Neanderthals. *Geological Quarterly* **2017**, *61(2)*, 350–369. [<https://doi.org/10.7306/gq.1355>]
53. Kowalski, K. Fossil fauna. Studies on Raj Cave near Kielce (Poland) and its deposits. *Fol. Quat.* **1972**, *41*, 45–60.
54. Kopacz, J.; Skalski, A.W. Excavations of the cave system in the Towarne Mountains near Częstochowa. *Arch. Pol.* **1976**, *17*, 163–175.
55. Krukowski, S. Paleolit. Prehistoria Ziemi Polskich, Kraków, **1939**, 4, cz. 1.
56. Kowalski, K. *Jaskinie Polski, tom III*. Państwowe Wydawnictwo Naukowe, Warszawa, **1954**; p 191.
57. Marciszak, A. Carnivores from Naciekowa Cave (Połom Hill, Kaczawskie Mts., south-west Poland). In *Guidebook of the 17th International Cave Bear Conference, September 15<sup>th</sup>-18th 2011*; Döppes, D.; Jogerm, U.; Nielbock, R.; Rosendahl W., Eds.; Einhornhöhle, Harz, Germany, 2011, p 20.
58. Frenzel, J. Knochenfunde in der Reyersdorfer Tropsteinhöhle. *Beit. Biol. Glatzer Schneeberges* **1936**, *2*, 121–134.

59. Frenzel, J. Die Reyersdorfer Tropsteinhöhle, ein schlesisches Naturdenkmal. *Schles. Heimat* **1937**, *1*, 6–11.
60. Bieroński, J.; Burdukiewicz, J.M.; Wiszniowska, T. Wyniki nowych badań Jaskini Radochowskiej. *Śląskie Spraw. Archeol.* **1985**, *26*, 5–18.
61. Bieroński, J.; Socha, P.; Stefaniak, K. Deposits and fauna of the Sudeten caves - the state of research. *Stud. Fac. Earth Scien. Univ. Silesia* **2007**, *45*, 183–201.
62. Bieroński, J.; Burdukiewicz, J.M.; Socha, P.; Stefaniak, K.; Hercman, H.; Nadachowski, A. Palaeogeographical, archeological and palaeozoological studies in the Radochowska Cave. *Stud. Fac. Earth Scien. Univ. Silesia* **2009a**, *56*, 455–475.
63. Lipecki, G.; Wolsan M. Carnivorans (Carnivora). In *Oblazowa Cave: human activity, stratigraphy and palaeoenvironment*; Valde-Nowak, P.; Nadachowski, A.; Madeyska, T., Eds.; IAE PAS, Kraków, **2003**, pp 125–129.
64. Valde-Nowak, P.; Nadachowski, A. Micoquian assemblage and environmental conditions for the Neanderthals in Oblazowa Cave, Western Carpathians, Poland. *Quat. Int.* **2014**, *326-327*, 146–156. [<https://doi.org/10.1016/j.quaint.2013.08.057>]
65. Kropczyk, A.; Marciszak, A. Ssaki stepu mamuciego ze śląskiego stanowiska Skarszyn koło Wrocławia. Kopernikańskie Seminarium Doktoranckie, Uniwersytet Mikołaja Kopernika w Toruniu, Toruń. Monografia pokonferencyjna XV, **2022** (in press).
66. Wiśniewski, A.; Stefaniak, K.; Wojtal, P.; Zych, J.; Nadachowski, A.; Musil, R.; Badura, J.; Przybylski, B. Archaeofauna or palaeontological record? Remarks on Pleistocene fauna from Silesia. *Spraw. Archeol.* **2009**, *61*, 1–62.
67. Marciszak, A.; Kotowski, A.; Przybylski, B.; Badura, J.; Wiśniewski, A.; Stefaniak, K. Large mammals from historical collections of open-air sites of Silesia (southern Poland) with special reference to carnivores and rhinoceros. *Hist. Biol.* **2019a**, *31(6)*, 696–730. [<https://doi.org/10.1080/08912963.2017.1388377>]
68. Lipecki, G.; Wojtal, P. Carnivores from the open-air Gravettian site Kraków Spadzista. In *A Gravettian site in Southern Poland: Kraków Spadzista*; Wilczyński, J. Wojtal, P. Haynes G., Eds.; ISEA PAS, Kraków, **2015**, pp 117–157.
69. Wilczyński, J.; Wojtal, P.; Sobczyk, K. Spatial organization of the Gravettian mammoth hunters site – Kraków Spadzista (southern Poland). *J. Archaeol. Sci.* **2012**, *39*, 3627–3642. [<https://doi.org/10.1016/j.jas.2012.05.012>]
70. Wojtal, P.; Wilczyński, J. Zooarchaeological studies of large mammal remains from Kraków Spadzista site - trench C2 and trench E1 (2011-2012 excavations). In *A Gravettian site in southern Poland: Kraków Spadzista*; Wilczyński, J.; Wojtal, P.; Haynes, G., Eds.; ISEA PAS, Kraków, 2015, pp 93–111.
71. Herr, O. Diluviale und altalluviale Säugetierreste aus der Oberlausitz. *Abh. Naturforsch. Ges. Görlitz* **1924**, *29*, 92–101.
72. Muzolf, B.; Stefaniak, K.; Tomek, T.; Wertz, K.; Socha, P.; Cyrek, K.; Mirosław-Grabowska, J.; Madeyska, T.; Nadachowski, A. Multicollate sites on Mt. Birów in Podzamcze. *Stud. Fac. Earth Scien. Univ. Silesia* **2009**, *56*, 283–294.

73. Wilczyński, J.; Wojtal, P.; Łanczont, M.; Mroczek, P.; Sobieraj, D.; Fedorowicz, S. Loess, flints and bones: Multidisciplinary research at Jaksice II Gravettian site (southern Poland). *Quat. Int.* **2015**, *359–360*, 114–130. [<https://doi.org/10.1016/j.quaint.2014.04.002>]
74. Marciszak, A.; Lipecki, G.; Gornig, W.; Wilczyński, J. Carnivores from the Borsuka Cave (southern Poland) as an example of changes in carnivore assemblages during MIS 2 and MIS 1. *Acta Zool. Crac.* **2017**, *A60(2)*, 105–146. [DOI: 10.3409/azc.60\_2.105.]
75. Nadachowski, A.; Harrison, D.L.; Szyndlar, Z.; Tomek, T.; Wolsan, M. Late Pleistocene vertebrate fauna from Obłazowa 2 (Carpathians, Poland): palaeological reconstruction. *Acta Zool. Crac.* **1993**, *36(2)*, 281–290.
76. Stefaniak, K.; Muzolf, B.; Mirosław-Grabowska, J.; Socha, P. Studies in the caves of the Zegarowe Rocks. In *Karst of the Częstochowa Upland and the Eastern Sudetes—palaeoenvironments and protection*. Stud. Fac. Earth Scien. Univ. Silesia, *56*; Stefaniak, K.; Socha, P.; Tyc, A., Eds.; 2009a, pp 255–271.
77. Pax, F.; Maschke, K. Höhlenfauna des Glatzer Schneeberges. Die rezente Metazoenfauna. *Beit. Biol. Glatzer Schneeberges* **1935**, *1*, 4–72.
78. Bieroński, J.; Socha, P.; Stefaniak, K.; Hercman, H.; Gąsiorowski, M. Caves in Rogóżka-origin, sediments and fauna. *Stud. Fac. Earth Scien. Univ. Silesia* **2009b**, *56*, 477–489.
79. Marciszak, A.; Gornig, W.; Stefaniak, K. Large mammals (carnivores, artiodactyls) from Solna Jama Cave (Bystrzyckie Mts, Southwestern Poland) in the context of faunal changes in the postglacial period of Central Europe. *Palaeontol. Electron.* **2017**, *20(3A)*, 1–37. [<https://doi.org/10.26879/581>]
80. Lubicz-Niezabitowski, E. O kilku ciekawszych szczątkach kopalnych zwierząt ssących Polski. *Kosmos A* **1938a**, *62*, 431–438.
81. Lubicz-Niezabitowski, E. O kilku ciekawszych szczątkach kopalnych zwierząt ssących Polski. *Spraw. Pozn. TPN. Wydz. Mat.-Przyr.* **1938b**, *11*, 77–78.
82. Bratlund, B. 2002. The faunal remains from Wilczyce. Recent studies on the final Palaeolithic of the European plain. In *Proceedings of a U.I.S.P.P. Symposium, Stockholm*. Jutland Archaeological Society Publications 39; Eriksen, B.V.; Bratlund B., Ed.; Narayana Press: Højbjerg. **1999**, 101–107
83. Irish, J.D.; Bratlund, B.; Schild, R.; Kolstrup, E.; Królik, H.; Mańka, D.; Boroń, T. A late Magdalenian perinatal human skeleton from Wilczyce, Poland. *J. Hum. Evol.* **2008**, *55*, 736–740. [<https://doi.org/10.1016/j.jhevol.2008.03.007>]
84. Lasota-Moskalewska, A. Wilczyce. A Late Magdalenian winter hunting camp in southern Poland. In *Faunal remains*; Schild, R., Ed.; IAE PAS, Warszawa, **2014**, pp 105–118.
85. Nadachowski, A.; Bratlund, B.; Tomek, T.; Miękinia, B.; Stworzewicz, E.; Szyndlar, Z. Faunal remains from Wilczyce and the paleoecological reconstruction of the area at the end of the Pleniglacial. In *Wilczyce. A Late Magdalenian winter hunting camp in southern Poland*; Schild, R., Ed.; IAE PAS, Warszawa, **2014**, pp 119–134.
86. Schild, R. Taphonomy and chronology of the settlement. In *Wilczyce. A Late Magdalenian winter hunting camp in southern Poland*; Schild R., Ed.; IAE PAS, Warszawa, 2014, pp 87–104.
87. Kowalski, K.; Kozłowski, J. K.; Kryszowska-Iwaszkiewicz, M.; Pawlikowa, B.; Wiktor, A. Badania osadów schronisk podskalnych w Żytniej Skale (Bębło, pow. Kraków). *Fol. Quat.* **1967**, *25*, 1–48.

88. Krysiak, K. Szczątki zwierzęce ze schroniska skalnego pod Podlesicami w pow. zawierciańskim. *Prace Mat. Muzeum Archeol. Etnogr. Łódź Ser. Archeologiczna*, **1956**, 41–47.
89. Chmielewska, M.; Pierzchałko L. Stanowisko wczesnomezolityczne w schronisku skalnym koło Podlesic w pow. zawierciańskim. *Prace Mat. Muzeum Archeol. Etnogr. Łódź Ser. Archeologiczna* **1956**, 1, 29–40.
90. Demetrykiewicz, Z.; Kuźniar, W. Najstarszy paleolit na ziemiach polskich oraz inne wykopaliska odkryte w jaskini “Okiennik”. *Prace Mat. Muzeum Archeol. Etnogr. Łódź Ser. Archeologiczna* **1914**, 13, 10–43.
91. Ossowski, G. Czwarte sprawozdanie z badań antropologiczno-archeologicznych w jaskiniach okolic Krakowa w 1882. *Zbiór Wiad. Antrop. Kraj.* **1883b**, 7, 66–88.
92. Ossowski, G. Sprawozdanie z badań geologiczno–antropologicznych dokonanych w 1879 w jaskiniach okolic Krakowa. *Zbiór Wiad. Antrop. Kraj.* **1880**, 4, 35–57.
93. Kowalski, K. *Jaskinie Polski, tom II*. Państwowe Muzeum Archeologiczne, Warszawa, **1953**; p 186.
94. Nadachowski, A.; Krajcarz, M.; Lemanik, A.; Lipecki, G.; Marciszak, A.; Miękina, B.; Stefaniak, K.; Tomek, T. Vertebrate remains from Krucza Skala Rockshelter. In *Late Magdalenian Campsite at Krucza Skala Rockshelter*; Cyrek, K.; Sudoł-Procyk, M.; Czyżewski, Ł., Eds.; Wyd. Nauk. UMK, Toruń, **2022**, pp 138–160.
95. Ossowski, G. Jaskinie okolic Ojcowa pod względem paleo-etnologicznym. *Pam. PAU Wyd. Mat.-Przyr.* **1885**, 11, 1–60.
96. Madeyska, T. Środowisko człowieka w środkowym i górnym paleolicie na ziemiach Polskich w świetle badań geologicznych. *Studia Geol. Pol.* **1981**, 69, 7–125.
97. Aleksandrowicz, S.W.; Nadachowski, A.; Rydlewski, J.; Valde-Nowak, P.; Wołoszyn, B.W. Subfossil fauna from a cave in the Sobczański Gully (Pieniny Mts., Poland). *Folia Quat.* **1985**, 56, 57–78.
98. Kowalski, K.; Kozłowski, J. K.; Krysowska, M.; Wiktor, A. Badania osadów schroniska w Puchaczkiej Skale w Prądniku Czerwonym, powiat Olkusz. *Fol. Quat.* **1965**, 20, 1–44.
99. Stefaniak, K.; Nadachowski, A.; Tomek, T.; Socha, P. Palaeontological studies in the Częstochowa Upland. In *Karst of the Częstochowa Upland and the Eastern Sudetes–palaeoenvironments and protection*. *Stud. Fac. Earth Scien. Univ. Silesia* 56; Stefaniak K., Socha P., Tyc A. Eds.; 2009b, pp 85–144.
100. Stefaniak, K.; Socha, P.; Tyc, A.; Cyrek, K.; Nadachowski, A. Caves, rock shelters and palaeontological sites in quarries of the Częstochowa Upland - catalogue of important speleological features. In *Karst of the Częstochowa Upland and the Eastern Sudetes - palaeoenvironments and protection*. *Stud. Fac. Earth Scien. Univ. Silesia* 56; Stefaniak, K.; Socha, P.; Tyc, A., Eds.; 2009c, pp 307–354.
101. Nadachowski, A. Fauna kopalna płazów, gadów i ssaków w osadach jaskiń i schronisk Doliny Sąspowskiej. In *Jaskinie Doliny Sąspowskiej. Tło przyrodnicze osadnictwa pradziejowego*. Prace IA UW, WUW, Warszawa, Chmielewski, W. Ed.; 1988a, pp 19–39.
102. Nadachowski, A. Osady jaskiń i schronisk Doliny Sąspowskiej. In *Jaskinie Doliny Sąspowskiej. Tło przyrodnicze osadnictwa pradziejowego*. Prace IA UW, WUW, Warszawa, Chmielewski, W. Ed.; 1988b, pp 77–173.
103. Ossowski, G. Drugie sprawozdanie z badań geologiczno-antropologicznych w jaskiniach okolic Krakowa w r. 1880. *Zbiór Wiad. Antrop. Kraj.* **1881**, 5, 18–46.

104. Ossowski, G. O szczątkach fauny dyluwialnej znalezionych w namule jaskiń wąwozu mnikowskiego. *Sprawozdanie Komisji Fizjograficznej* **1883a**, 17, 91–103.
105. Hoyer, H.F. Wyniki badan kości zebranych w 1922 w grotach dol. Kościeliskiej. *Spraw. Kom. Fizjog.* **1928**, 62, 27–30.
106. Bocheński, Z.; Ginter, B.; Kozłowski, J. K.; Mook W. G.; Muszyński, M.; Nadachowski, A.; Stworzewicz, E.; Szyndlar, Z. Badania osadów jaskiniowych schronisk w Zalasie koło Krakowa. *Folia Quat.* **1985**, 56, 15–37.
107. Conwentz, H. *Amtlicher Bericht über die Verwaltung der naturhistorischen, archaeologischen und ethnologischen Sammlungen des Westpreussischen Provinzial Museums für das Jahr 1894*, Danzig, **1899**, p 35,
108. Schirmacher, E. Die diluvialen Wirbelthierreste der Provinz Ost- und Westpreussen. Inaugural-Dissertation, Königsberg, 1882, pp 135.
109. Jentzsch, A. Über den Seehund des Elbinger Yoldia–Thones. *Z. Dtsch. Geol. Ges.* **1928**, 39, 496–498.
110. Hermann, R. Die Rhinocerosarten des westpreussischen Diluviums. *Sch. Naturf. Gesellsch. Danzig, NF.* **1913**, 13, 110–173.
111. Sonntag, P. Geologie von Westpreussen. Berlin, Borntraeger, 1919, 240 p.
112. Friedberg, W. Atlas geologiczny Galicji. *Kom. Fizjog. Akademii Umiej.* **1903**, 1(16), 1–147.
